# Supplementary material for: Thioredoxin System Protein Expression Is Associated with Poor Clinical Outcome in Adult and Paediatric Gliomas and Medulloblastomas
Source: PubMed Central journal article supplement (PMC7320063; doi:10.1007/s12035-020-01928-z), 2020-05-16
Supplement: 12035_2020_1928_MOESM1_ESM.pdf [file 12035_2020_1928_MOESM1_ESM.pdf]

## **Thioredoxin system protein expression is associated with poor clinical outcome in adult and paediatric gliomas and medulloblastomas.**

Anqi Yao<sup>1</sup>, Sarah J. Storr<sup>1</sup>, Khaled Al-hadyan<sup>1,4</sup>, Ruman Rahman<sup>2</sup>, Stuart Smith<sup>2</sup>, Richard Grundy<sup>2</sup>, Simon Paine<sup>3</sup>, Stewart G. Martin<sup>1,5</sup>

1 University of Nottingham, Division of Cancer and Stem Cells, Nottingham Breast Cancer Research Centre, Biodiscovery Institute, University Park, Nottingham NG7 2RD, UK.

2 University of Nottingham, Children's Brain Tumour Research Centre, Biodiscovery Institute, University Park, Nottingham NG7 2RD, UK.

3 Department of Neuropathology, Nottingham University Hospitals NHS Trust, Queen's Medical Centre, Nottingham, NG7 2UH, UK

4. Current address: Radiation Biology Section, Biomedical Physics Department, King Faisal Specialist Hospital and Research Centre, Riyadh, Kingdom of Saudi Arabia

5 Corresponding author: University of Nottingham, Division of Cancer and Stem Cells, Nottingham Breast Cancer Research Centre, Biodiscovery Institute, University Park, Nottingham NG7 2RD, UK.

Telephone: +44(0)115 823 1846

Email: [stewart.martin@nottingham.ac.uk](mailto:stewart.martin@nottingham.ac.uk).

**Supplementary Table 1: Clinicopathological variables of the adult GBM cohort.**

| <b>Variable</b>  | <b>Number of Patients</b> | <b>Percentage (%)</b> |
|------------------|---------------------------|-----------------------|
| Age (years)      |                           |                       |
| ≤59              | 10                        | 55.6                  |
| >59              | 8                         | 44.4                  |
| Gender           |                           |                       |
| Male             | 8                         | 44.4                  |
| Female           | 10                        | 55.6                  |
| Tumour Site      |                           |                       |
| Parietal         | 8                         | 44.4                  |
| Temporal         | 5                         | 27.8                  |
| Occipital        | 1                         | 5.6                   |
| Frontal          | 4                         | 22.2                  |
| Resection status |                           |                       |
| Complete         | 14                        | 77.8                  |
| Partial          | 4                         | 22.2                  |
| Radiotherapy     |                           |                       |
| 60 Gy            | 17                        | 94.4                  |
| < 60 Gy          | 1                         | 5.6                   |
| Temozolomide     |                           |                       |
| Yes              | 16                        | 88.9                  |
| No               | 2                         | 11.1                  |
| Gliadel wafer    |                           |                       |
| Yes              | 9                         | 50.0                  |
| No               | 9                         | 50.0                  |
| IDH-1            |                           |                       |
| Wild-type        | 17                        | 94.4                  |
| Mutant           | 1                         | 5.6                   |
| MGMT status      |                           |                       |
| Hypomethylated   | 9                         | 90.0                  |
| Hypermethylated  | 1                         | 10.0                  |
| N/A              | 8                         |                       |
| Survival status  |                           |                       |
| Living           | 4                         | 28.6                  |
| Deceased         | 14                        | 77.8                  |

Abbreviations: GBM, glioblastoma; IDH1, isocitrate dehydrogenase 1; MGMT, O-6-methylguanine DNA methyltransferase; N/A, not available.

**Supplementary Table 2: Clinicopathological variables of the paediatric LGG and HGG cohorts.**

| <b>Variable</b>  | <b>pLGG cohort<br/>N (%)</b> | <b>pHGG cohort<br/>N (%)</b> |
|------------------|------------------------------|------------------------------|
| Age (years)      |                              |                              |
| ≤3               | 25 (23.1)                    | 23 (20.2)                    |
| >3               | 83 (76.9)                    | 91 (79.8)                    |
| ND               | 18                           | 23                           |
| Gender           |                              |                              |
| Male             | 57 (52.3)                    | 80 (63.0)                    |
| Female           | 52 (47.7)                    | 47 (37.0)                    |
| ND               | 17                           | 10                           |
| Tumour site      |                              |                              |
| Supratentorial   | 38 (35.2)                    | 84 (71.8)                    |
| Infratentorial   | 70 (64.8)                    | 33 (28.2)                    |
| ND               | 18                           | 20                           |
| Tumour grade     |                              |                              |
| I                | 92 (80.7)                    | 0 (0.0)                      |
| II               | 22 (19.3)                    | 0 (0.0)                      |
| III              | 0 (0.0)                      | 35 (26.7)                    |
| IV               | 0 (0.0)                      | 96 (73.3)                    |
| ND               | 12                           | 6                            |
| Resection status |                              |                              |
| Complete         | NA                           | 16 (15.8)                    |
| Partial          | NA                           | 44 (43.6)                    |
| Biopsy           | NA                           | 41 (40.6)                    |
| ND               | 126                          | 36                           |
| Recurrent status |                              |                              |
| Yes              | 43 (40.6)                    | 96 (88.9)                    |
| No               | 63 (59.4)                    | 12 (11.1)                    |
| ND               | 20                           | 29                           |
| Survival status  |                              |                              |
| Living           | 77 (73.3)                    | 19 (17.3)                    |
| Deceased         | 28 (26.7)                    | 91 (82.7)                    |
| ND               | 21                           | 27                           |

Abbreviations: pLGG, paediatric low-grade glioma; pHGG, paediatric high-grade glioma; ND, not determined.

**Supplementary Table 3: Clinicopathological variables of the MB cohort.**

| <b>Variable</b>               | <b>Number of Patients</b> | <b>Percentage (%)</b> |
|-------------------------------|---------------------------|-----------------------|
| Age (years)                   |                           |                       |
| ≤3                            | 20                        | 18.7                  |
| >3                            | 87                        | 81.3                  |
| ND                            | 7                         |                       |
| Gender                        |                           |                       |
| Male                          | 78                        | 72.2                  |
| Female                        | 30                        | 27.8                  |
| ND                            | 6                         |                       |
| Histological Classification   |                           |                       |
| Classical                     | 57                        | 61.3                  |
| Desmoplastic                  | 15                        | 16.1                  |
| Large cell/anaplastic variant | 16                        | 17.2                  |
| Extensive nodularity          | 1                         | 1.1                   |
| myogenic                      | 4                         | 4.3                   |
| ND                            | 21                        |                       |
| Resection status              |                           |                       |
| Complete                      | 52                        | 61.2                  |
| Partial                       | 33                        | 38.8                  |
| ND                            | 29                        |                       |
| Recurrent status              |                           |                       |
| Yes                           | 42                        | 44.7                  |
| No                            | 52                        | 55.3                  |
| ND                            | 20                        |                       |
| Metastatic stage              |                           |                       |
| M0                            | 56                        | 60.9                  |
| M1                            | 6                         | 6.5                   |
| M2                            | 10                        | 10.9                  |
| M3                            | 17                        | 18.5                  |
| M4                            | 3                         | 3.3                   |
| ND                            | 22                        |                       |
| Survival status               |                           |                       |
| Living                        | 44                        | 45.4                  |
| Deceased                      | 53                        | 54.6                  |
| ND                            | 17                        |                       |

Abbreviations: MB, medulloblastoma; ND, not determine

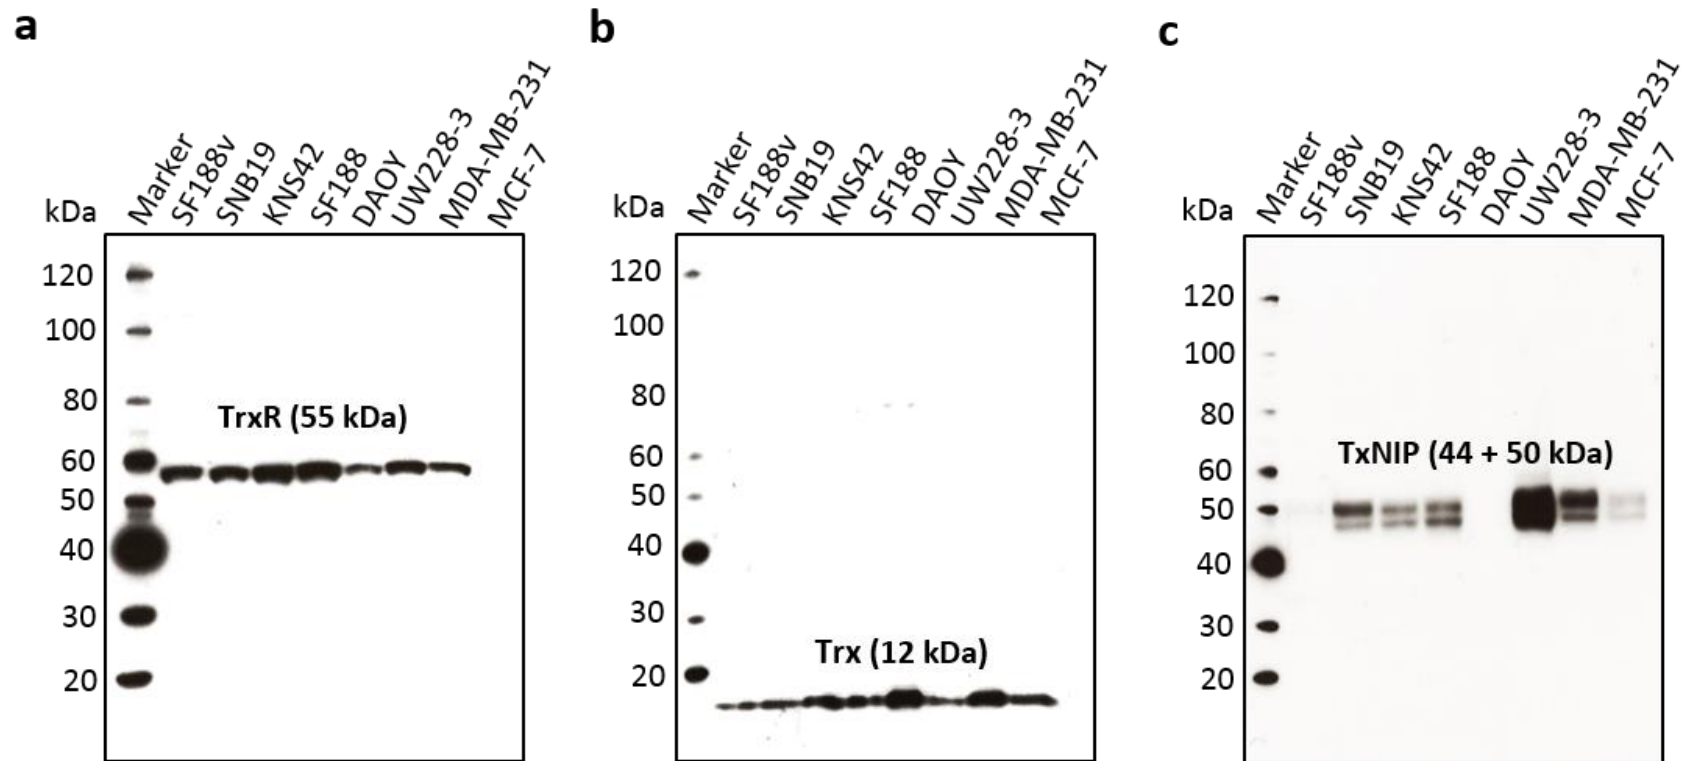

**Supplementary Figure 1: The specificity of anti-TrxR, anti-Trx and anti-TxNIP antibodies.** (a) TrxR, (b) Trx and (c) TxNIP expression across the panel of 6 brain (representing different tumour types) and 2 breast cancer cell lines were detected by Western blotting analysis. A single band corresponding to the molecular mass of the intended target was observed in the Western blotting studies which indicated the specificity of all antibodies. Figures present the representative blots of two independent experiments with lysates from cells with different passage numbers.

**Supplementary Table 4: Intra-class correlation coefficient analysis of Trx, TrxR and TxNIP scoring across different brain tumour cohorts.**

| <b>Markers</b>    | <b>Tumour types</b> |                       |                       |           |
|-------------------|---------------------|-----------------------|-----------------------|-----------|
|                   | <b>Adult GBM</b>    | <b>Paediatric LGG</b> | <b>Paediatric HGG</b> | <b>MB</b> |
| Cytoplasmic TrxR  | 0.701               | 0.724                 | 0.702                 | 0.712     |
| Nuclear TrxR      | 0.796               | 0.741                 | 0.836                 | 0.900     |
| Cytoplasmic Trx   | 0.835               | 0.734                 | 0.874                 | 0.897     |
| Nuclear Trx       | 0.790               | 0.700                 | 0.925                 | 0.892     |
| Cytoplasmic TxNIP | 0.808               | 0.740                 | 0.873                 | 0.956     |

Abbreviations: GBM, glioblastoma; LGG, low-grade glioma; HGG, high-grade glioma; MB, medulloblastoma.

**Supplementary Table 5: The median scores and ranges of TrxR, Trx and TxNIP expression in all four brain tumour cohorts.**

| Markers           | Adult GBM       |                 |                  | Paediatric LGG | Paediatric HGG  | MB              |
|-------------------|-----------------|-----------------|------------------|----------------|-----------------|-----------------|
|                   | Core            | Rim             | Invasive         |                |                 |                 |
| Cytoplasmic TrxR  | 78<br>(30-187)  | 100<br>(77-190) | 86<br>(50-105)   | 120<br>(5-235) | 67<br>(0-217)   | 130<br>(0-270)  |
| Nuclear TrxR (%)  | 47<br>(7-95)    | 72<br>(15-100)  | 79<br>(45-98)    | 55<br>(0-95)   | 36<br>(0-100)   | 64<br>(0-100)   |
| Cytoplasmic Trx   | 122<br>(5-185)  | 105<br>(0-198)  | 105<br>(90-140)  | 97<br>(0-273)  | 110<br>(0-283)  | 137<br>(0-280)  |
| Nuclear Trx (%)   | 35<br>(0-90)    | 34<br>(0-90)    | 52<br>(10-85)    | 12<br>(0-88)   | 30<br>(0-98)    | 38<br>(0-99)    |
| Cytoplasmic TxNIP | 175<br>(45-228) | 140<br>(30-222) | 170<br>(115-195) | 173<br>(0-280) | 188<br>(10-280) | 150<br>(12-270) |

Abbreviations: GBM, glioblastoma; LGG, low-grade glioma; HGG, high-grade glioma; MB, medulloblastoma.

**Supplementary Table 6: X-tile cut points for stratification of TrxR, Trx and TxNIP expression in all four brain tumour cohorts.**

| Markers           | Adult GBM |     |          | Paediatric LGG | Paediatric HGG | MB  |
|-------------------|-----------|-----|----------|----------------|----------------|-----|
|                   | Core      | Rim | Invasive |                |                |     |
| Cytoplasmic TrxR  | 78        | 100 | 86       | 167            | 160            | 180 |
| Nuclear TrxR (%)  | 63        | 80  | 85       | 77             | 58             | 58  |
| Cytoplasmic Trx   | 143       | 150 | 105      | 27             | 160            | 172 |
| Nuclear Trx (%)   | 38        | 23  | 60       | 14             | 57             | 60  |
| Cytoplasmic TxNIP | 175       | 173 | 175      | 140            | 195            | 125 |

Abbreviations: GBM, glioblastoma; LGG, low-grade glioma; HGG, high-grade glioma; MB, medulloblastoma.

**Supplementary Table 7: Associations between TrxR expression and clinicopathological variables in adult glioblastoma (Core + Invasive margin).**

| Variable         | Nuclear TrxR (Core) |           |                 | Cytoplasmic TrxR (Invasive) |           |                 |
|------------------|---------------------|-----------|-----------------|-----------------------------|-----------|-----------------|
|                  | Low                 | High      | <i>P</i> -value | Low                         | High      | <i>P</i> -value |
| Age (years)      |                     |           |                 |                             |           |                 |
| ≤ 59             | 7 (50.0%)           | 2 (14.3%) | 0.580           | 5 (41.7%)                   | 3 (25.0%) | 0.545           |
| > 59             | 3 (21.4%)           | 2 (14.3%) |                 | 1 (8.3%)                    | 3 (25.0%) |                 |
| Gender           |                     |           |                 |                             |           |                 |
| Male             | 6 (42.9%)           | 1 (7.1%)  | 0.559           | 0 (0.0%)                    | 5 (41.7%) | <b>0.015</b>    |
| Female           | 4 (28.6%)           | 3 (21.4%) |                 | 6 (50.0%)                   | 1 (8.3%)  |                 |
| Tumour site      |                     |           |                 |                             |           |                 |
| Parietal         | 7 (50.0%)           | 0 (0.0%)  | <b>0.008</b>    | 1 (8.3%)                    | 3 (25.0%) | 0.096           |
| Temporal         | 0 (0.0%)            | 3 (21.4%) |                 | 4 (33.3%)                   | 0 (0.0%)  |                 |
| Occipital        | 1 (7.1%)            | 0 (0.0%)  |                 | 0 (0.0%)                    | 1 (8.3%)  |                 |
| Frontal          | 2 (14.3%)           | 1 (7.1%)  |                 | 1 (8.3%)                    | 2 (16.7%) |                 |
| Resection status |                     |           |                 |                             |           |                 |
| Complete         | 6 (42.9%)           | 7 (50.0%) | 1.000           | 2 (16.7%)                   | 7 (58.3%) | 0.236           |
| Partial          | 1 (7.1%)            | 0 (0.0%)  |                 | 2 (16.7%)                   | 1 (8.3%)  |                 |
| IDH-1 status     |                     |           |                 |                             |           |                 |
| Wild-type        | 10 (71.4%)          | 3 (21.4%) | 0.286           | 5 (41.7%)                   | 6 (50.0%) | 1.000           |
| Mutant           | 0 (0.0%)            | 1 (7.1%)  |                 | 1 (8.3%)                    | 0 (0.0%)  |                 |

The *P* values are resultant from the Pearson  $\chi^2$  test of association or Fisher's Exact test if a cell count was less than five. Significant *P* values are indicated in bold.



**Supplementary Table 8: Associations between TrxR and TxNIP expression and clinicopathological variables in paediatric low-grade glioma.**

| Variable       | Cytoplasmic TrxR |             |              | Nuclear TrxR  |               |              | Cytoplasmic TxNIP |               |              |
|----------------|------------------|-------------|--------------|---------------|---------------|--------------|-------------------|---------------|--------------|
|                | Low              | High        | <i>P</i>     | Low           | High          | <i>P</i>     | Low               | High          | <i>P</i>     |
| Age            |                  |             |              |               |               |              |                   |               |              |
| ≤3             | 14<br>(17.9%)    | 3<br>(3.8%) | 0.682        | 9<br>(11.5%)  | 8<br>(10.3%)  | 0.072        | 5<br>(6.1%)       | 12<br>(14.6%) | 0.644        |
| >3             | 54<br>(69.2%)    | 7<br>(9.0%) |              | 46<br>(59%)   | 15<br>(19.2%) |              | 23<br>(28.0%)     | 42<br>(51.2%) |              |
| Gender         |                  |             |              |               |               |              |                   |               |              |
| Male           | 31<br>(46.3%)    | 5<br>(7.5%) | 0.437        | 26<br>(38.8%) | 10<br>(14.9%) | 0.498        | 15<br>(21.1%)     | 22<br>(31.0%) | 0.474        |
| Female         | 29<br>(43.3%)    | 2<br>(3.0%) |              | 20<br>(29.9%) | 11<br>(16.4%) |              | 11<br>(15.5%)     | 23<br>(32.4%) |              |
| Tumour site    |                  |             |              |               |               |              |                   |               |              |
| Supratentorial | 14<br>(21.2%)    | 6<br>(9.1%) | <b>0.002</b> | 17<br>(25.8%) | 3<br>(4.5%)   | 0.083        | 5<br>(7.1%)       | 17<br>(24.3%) | 0.125        |
| Infratentorial | 45<br>(68.2%)    | 1<br>(1.5%) |              | 28<br>(42.4%) | 18<br>(27.3%) |              | 20<br>(28.6%)     | 28<br>(40.0%) |              |
| Recurrence     |                  |             |              |               |               |              |                   |               |              |
| No             | 43<br>(66.2%)    | 1<br>(1.5%) | <b>0.004</b> | 25<br>(38.5%) | 19<br>(29.2%) | <b>0.001</b> | 12<br>(17.4%)     | 34<br>(49.3%) | <b>0.013</b> |
| Yes            | 15<br>(23.1%)    | 6<br>(9.2%) |              | 20<br>(30.8%) | 1<br>(1.5%)   |              | 13<br>(18.8%)     | 10<br>(14.5%) |              |

The *P* values are resultant from the Pearson  $\chi^2$  test of association or Fisher's Exact test if a cell count was less than five. Significant *P* values are indicated in bold. The table does not include the number of observations where clinicopathological data or scores were not available.

**Supplementary Table 9: Associations between Trx expression and clinicopathological variables in paediatric low-grade glioma.**

| Variable       | Cytoplasmic Trx |               |              | Nuclear Trx   |               |          |
|----------------|-----------------|---------------|--------------|---------------|---------------|----------|
|                | Low             | High          | <i>P</i>     | Low           | High          | <i>P</i> |
| Age            |                 |               |              |               |               |          |
| ≤3             | 2<br>(2.6%)     | 15<br>(19.2%) | 0.643        | 8<br>(10.3%)  | 9<br>(11.5%)  | 0.526    |
| >3             | 5<br>(6.4)      | 56<br>(71.8%) |              | 34<br>(43.6%) | 27<br>(34.6%) |          |
| Gender         |                 |               |              |               |               |          |
| Male           | 4<br>(5.9%)     | 32<br>(47.1%) | 1.000        | 17<br>(25.0%) | 19<br>(27.9%) | 0.316    |
| Female         | 3<br>(4.4%)     | 29<br>(42.6%) |              | 19<br>(27.9%) | 13<br>(19.1%) |          |
| Tumour site    |                 |               |              |               |               |          |
| Supratentorial | 2<br>(30.0%)    | 19<br>(28.4%) | 1.000        | 12<br>(17.9%) | 9<br>(13.4%)  | 0.587    |
| Infratentorial | 5<br>(7.5%)     | 41<br>(61.2%) |              | 23<br>(34.3%) | 23<br>(34.3%) |          |
| Recurrence     |                 |               |              |               |               |          |
| No             | 2<br>(3.0%)     | 43<br>(65.2%) | <b>0.029</b> | 22<br>(33.3%) | 23<br>(34.8%) | 0.324    |
| Yes            | 5<br>(7.6%)     | 16<br>(24.2%) |              | 13<br>(19.7%) | 8<br>(12.1%)  |          |

The *P* values are resultant from the Pearson  $\chi^2$  test of association or Fisher's Exact test if a cell count was less than five. Significant *P* values are indicated in bold. The table does not include the number of observations where clinicopathological data or scores were not available.

**Supplementary Table 10: Associations between Trx and TxNIP expression and clinicopathological variables in paediatric high-grade glioma.**

| Variable              | Cytoplasmic Trx |               |              | Nuclear Trx   |               |          | Cytoplasmic TxNIP |               |              |
|-----------------------|-----------------|---------------|--------------|---------------|---------------|----------|-------------------|---------------|--------------|
|                       | Low             | High          | <i>P</i>     | Low           | High          | <i>P</i> | Low               | High          | <i>P</i>     |
| Age                   |                 |               |              |               |               |          |                   |               |              |
| ≤3                    | 16<br>(15.0%)   | 2<br>(1.9%)   | 0.145        | 17<br>(15.7%) | 1<br>(0.9%)   | 0.188    | 6<br>(6.3%)       | 11<br>(11.6%) | 0.114        |
| >3                    | 62<br>(57.9%)   | 27<br>(25.2%) |              | 72<br>(66.7%) | 18<br>(16.7%) |          | 44<br>(46.3%)     | 34<br>(35.8%) |              |
| Gender                |                 |               |              |               |               |          |                   |               |              |
| Male                  | 41<br>(51.3%)   | 9<br>(11.3%)  | 0.564        | 41<br>(51.3%) | 9<br>(11.3%)  | 0.520    | 21<br>(30.0%)     | 25<br>(35.7%) | 0.314        |
| Female                | 23<br>(28.8%)   | 7<br>(8.8%)   |              | 27<br>(33.8%) | 3<br>(3.8%)   |          | 14<br>(20.0%)     | 10<br>(14.3%) |              |
| Histological subtypes |                 |               |              |               |               |          |                   |               |              |
| AA                    | 16<br>(20.8%)   | 2<br>(2.6%)   | <b>0.008</b> | 16<br>(20.8%) | 2<br>(2.6%)   | 0.189    | 12<br>(17.9%)     | 3<br>(4.5%)   | <b>0.009</b> |
| GBM                   | 42<br>(54.5%)   | 9<br>(11.7%)  |              | 44<br>(57.1%) | 7<br>(9.1%)   |          | 17<br>(25.4%)     | 28<br>(41.8%) |              |
| AO                    | 3<br>(3.9%)     | 5<br>(6.5%)   |              | 5<br>(6.5%)   | 3<br>(3.9%)   |          | 5<br>(7.5%)       | 2<br>(3.0%)   |              |
| Tumour site           |                 |               |              |               |               |          |                   |               |              |
| Supratentorial        | 52<br>(67.5%)   | 14<br>(18.2%) | 1.000        | 55<br>(71.4%) | 11<br>(14.3%) | 1.000    | 25<br>(36.8%)     | 32<br>(47.1%) | <b>0.021</b> |
| Infratentorial        | 9<br>(11.7%)    | 2<br>(2.6%)   |              | 10<br>(13.0%) | 1<br>(1.3%)   |          | 9<br>(13.2%)      | 2<br>(2.9%)   |              |
| WHO grade             |                 |               |              |               |               |          |                   |               |              |
| III                   | 19<br>(24.7%)   | 6<br>(7.8%)   | 0.545        | 21<br>(27.3%) | 4<br>(5.2%)   | 0.741    | 16<br>(23.9%)     | 5<br>(7.5%)   | <b>0.005</b> |
| IV                    | 43<br>(55.8%)   | 9<br>(11.7%)  |              | 45<br>(58.4%) | 7<br>(9.1%)   |          | 18<br>(26.9%)     | 28<br>(41.8%) |              |
| Extent of resection   |                 |               |              |               |               |          |                   |               |              |
| Gross total           | 12<br>(18.5%)   | 1<br>(1.5%)   | 0.446        | 13<br>(20.0%) | 0<br>(0.0%)   | 0.141    | 8<br>(13.3%)      | 4<br>(6.7%)   | 0.333        |
| Subtotal              | 25<br>(38.5%)   | 8<br>(12.3%)  |              | 25<br>(38.5%) | 8<br>(12.3%)  |          | 13<br>(21.7%)     | 18<br>(30.0%) |              |
| Biopsy                | 15<br>(23.1%)   | 4<br>(6.2%)   |              | 16<br>(24.6%) | 3<br>(4.6%)   |          | 9<br>(15.0%)      | 8<br>(13.3%)  |              |
| Recurrence            |                 |               |              |               |               |          |                   |               |              |
| No                    | 10<br>(14.5%)   | 0<br>(0.0%)   | 0.189        | 9<br>(13.0%)  | 1<br>(1.4%)   | 1.000    | 7<br>(11.3%)      | 3<br>(4.8%)   | 0.167        |
| Yes                   | 46<br>(66.7%)   | 13<br>(18.8%) |              | 50<br>(72.5%) | 9<br>(13.0%)  |          | 24<br>(38.7%)     | 28<br>(45.2%) |              |

The *P* values are resultant from the Pearson  $\chi^2$  test of association or Fisher's Exact test if a cell count was less than five. Significant *P* values are indicated in bold. Abbreviations: AA, anaplastic astrocytoma; GBM, glioblastoma multiforme; AO, anaplastic oligodendroglioma.

**Supplementary Table 11: Associations between Trx expression and clinicopathological variables in paediatric medulloblastoma.**

| Variable                     | Cytoplasmic Trx |               |              | Nuclear Trx   |               |              |
|------------------------------|-----------------|---------------|--------------|---------------|---------------|--------------|
|                              | Low             | High          | <i>P</i>     | Low           | High          | <i>P</i>     |
| Age                          |                 |               |              |               |               |              |
| ≤3                           | 7<br>(8.8%)     | 5<br>(6.3%)   | 0.495        | 9<br>(11.3%)  | 3<br>(3.8%)   | 0.711        |
| >3                           | 49<br>(61.3%)   | 19<br>(23.8%) |              | 54<br>(67.5%) | 14<br>(17.5%) |              |
| Gender                       |                 |               |              |               |               |              |
| Male                         | 35<br>(46.7%)   | 15<br>(20.0%) | 0.859        | 40<br>(53.3%) | 10<br>(13.3%) | 0.690        |
| Female                       | 17<br>(22.7%)   | 8<br>(10.7%)  |              | 19<br>(25.3%) | 6<br>(8.0%)   |              |
| Histological subtypes        |                 |               |              |               |               |              |
| Classic                      | 28<br>(45.2%)   | 15<br>(24.2%) | 0.149        | 35<br>(56.5%) | 8<br>(12.9%)  | <b>0.041</b> |
| Desmoplastic/nodular         | 7<br>(11.3%)    | 1<br>(1.6%)   |              | 7<br>(11.3%)  | 1<br>(1.6%)   |              |
| MB with extensive nodularity | 0<br>(0.0%)     | 2<br>(3.2%)   |              | 0<br>(0.0%)   | 2<br>(3.2%)   |              |
| Large cell/ anaplastic       | 5<br>(8.1%)     | 2<br>(3.2%)   |              | 4<br>(6.5%)   | 3<br>(4.8%)   |              |
| Medullomyoblastoma           | 2<br>(3.2%)     | 0<br>(0.0%)   |              | 2<br>(3.2%)   | 0<br>(0.0%)   |              |
| Extent of resection          |                 |               |              |               |               |              |
| Complete                     | 26<br>(44.1%)   | 11<br>(18.6%) | 0.559        | 20<br>(33.9%) | 2<br>(3.4%)   | 0.179        |
| Partial                      | 17<br>(28.8%)   | 5<br>(8.5%)   |              | 27<br>(45.8%) | 10<br>(16.9%) |              |
| Recurrence                   |                 |               |              |               |               |              |
| Yes                          | 18<br>(28.1%)   | 14<br>(21.9%) | <b>0.031</b> | 21<br>(32.8%) | 11<br>(17.2%) | <b>0.016</b> |
| No                           | 26<br>(40.6%)   | 6<br>(9.4%)   |              | 29<br>(45.3%) | 3<br>(4.7%)   |              |
| Metastasis                   |                 |               |              |               |               |              |
| Absence                      | 28<br>(45.9%)   | 10<br>(16.4%) | 0.482        | 31<br>(50.8%) | 7<br>(11.5%)  | 1.000        |
| Presence                     | 15<br>(24.6%)   | 8<br>(13.1%)  |              | 19<br>(31.1%) | 4<br>(6.6%)   |              |

The *P* values are resultant from the Pearson  $\chi^2$  test of association or Fisher's Exact test if a cell count was less than five. Significant *P* values are indicated in bold.

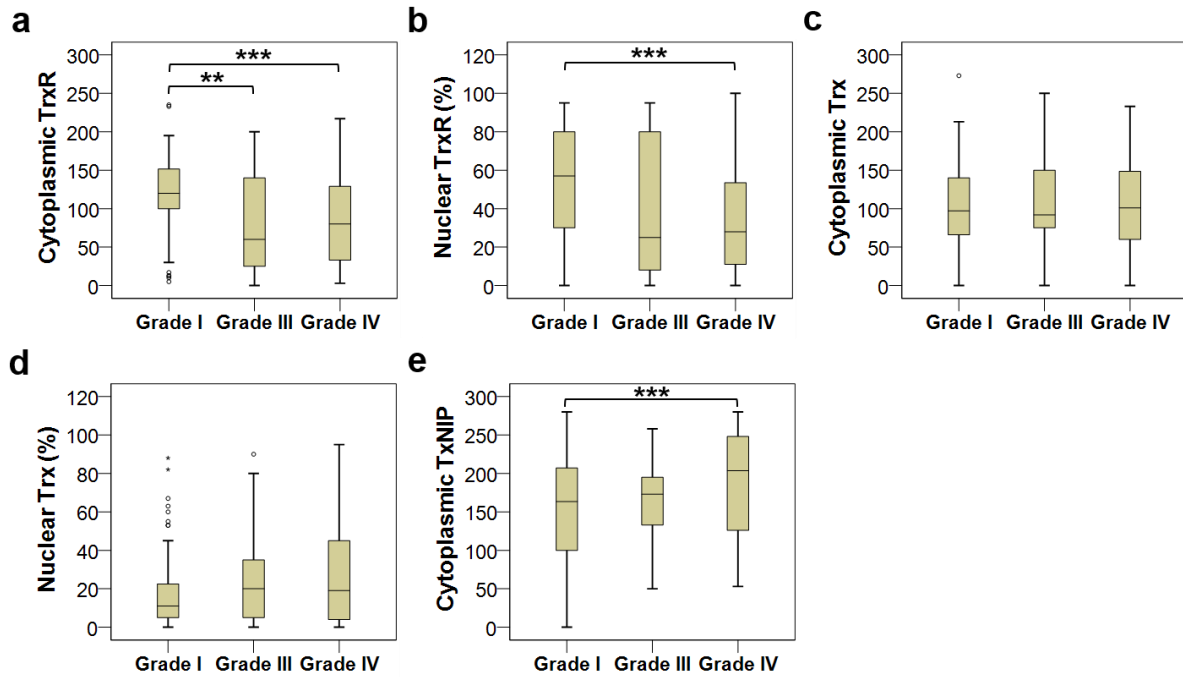

**Supplementary Figure 2: Box plots of protein expression in different WHO grades of paediatric gliomas.**

The expression of cytoplasmic TrxR (a) is significantly higher in grade I gliomas than both grade III ( $P=0.010$ ) and grade IV gliomas ( $P=0.001$ ). The expression of nuclear TrxR (b) is also significantly greater in grade I gliomas than grade IV gliomas ( $P=0.001$ ), but not grade III gliomas ( $P=0.085$ ). No significant difference of both cytoplasmic Trx (c) ( $P=0.876$ ) and nuclear Trx (d) ( $P=0.448$ ) expression is detected between tumour grades. A significantly higher expression of TxNIP (e) is noted in grade IV gliomas compared to grade I gliomas ( $P=0.001$ ). \*\* represents  $P\leq 0.01$ , \*\*\* represents  $P\leq 0.001$ .
